# Supplementary figures and images for: Large-scale growth of sharp gold nano-cones for single-molecule SERS detection
Source: Royal Society of Chemistry journal article supplement (doi:10.1039/c5ra22321k), 2015-12-03

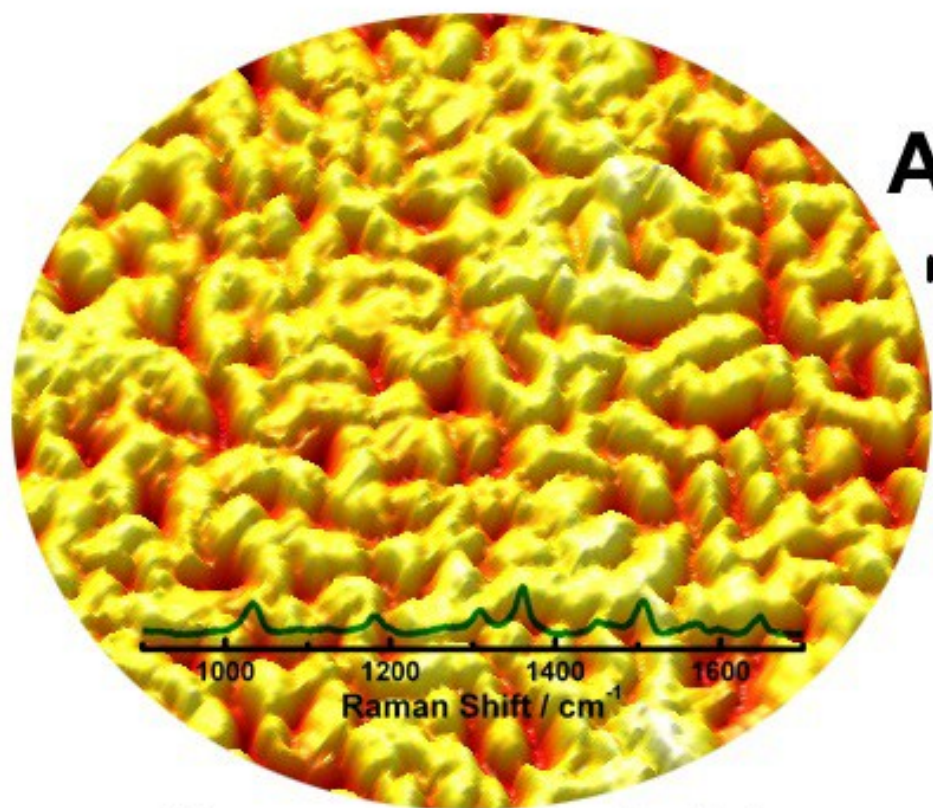

**Nanoporous Gold**

**Au Plating**

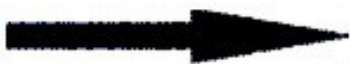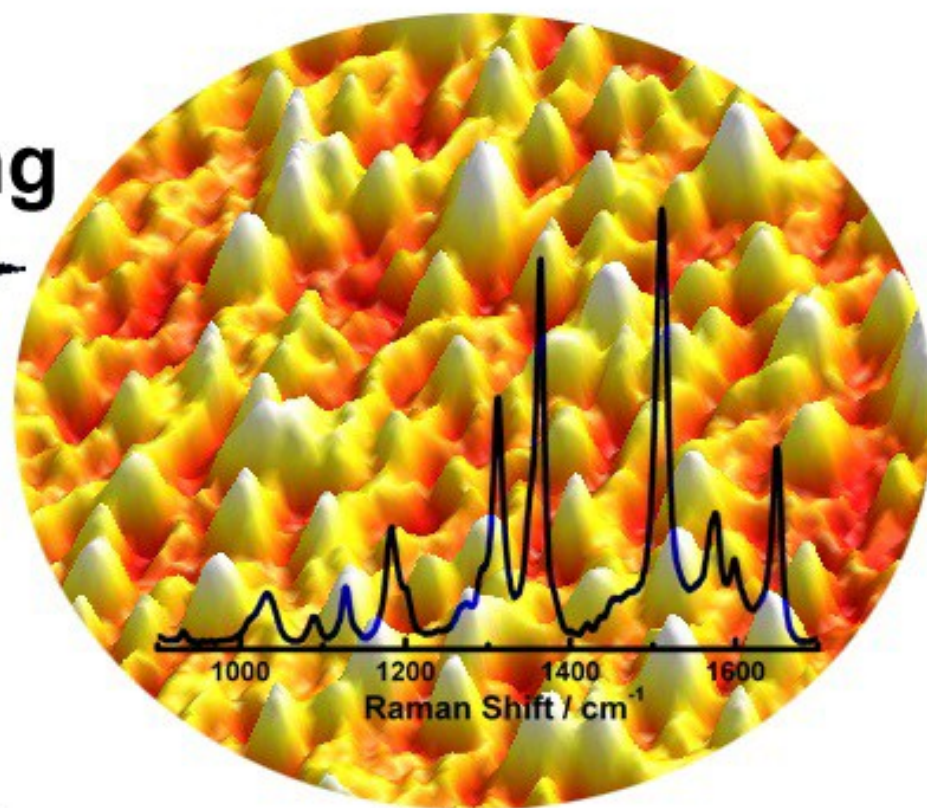

**Nano-cones@Nanoporous gold**

Supplement: c5ra22321k1.pdf [file c5ra22321k1.pdf]
